# Supplementary material
Source: PubMed Central journal article supplement (PMC3767181)

Figure S1

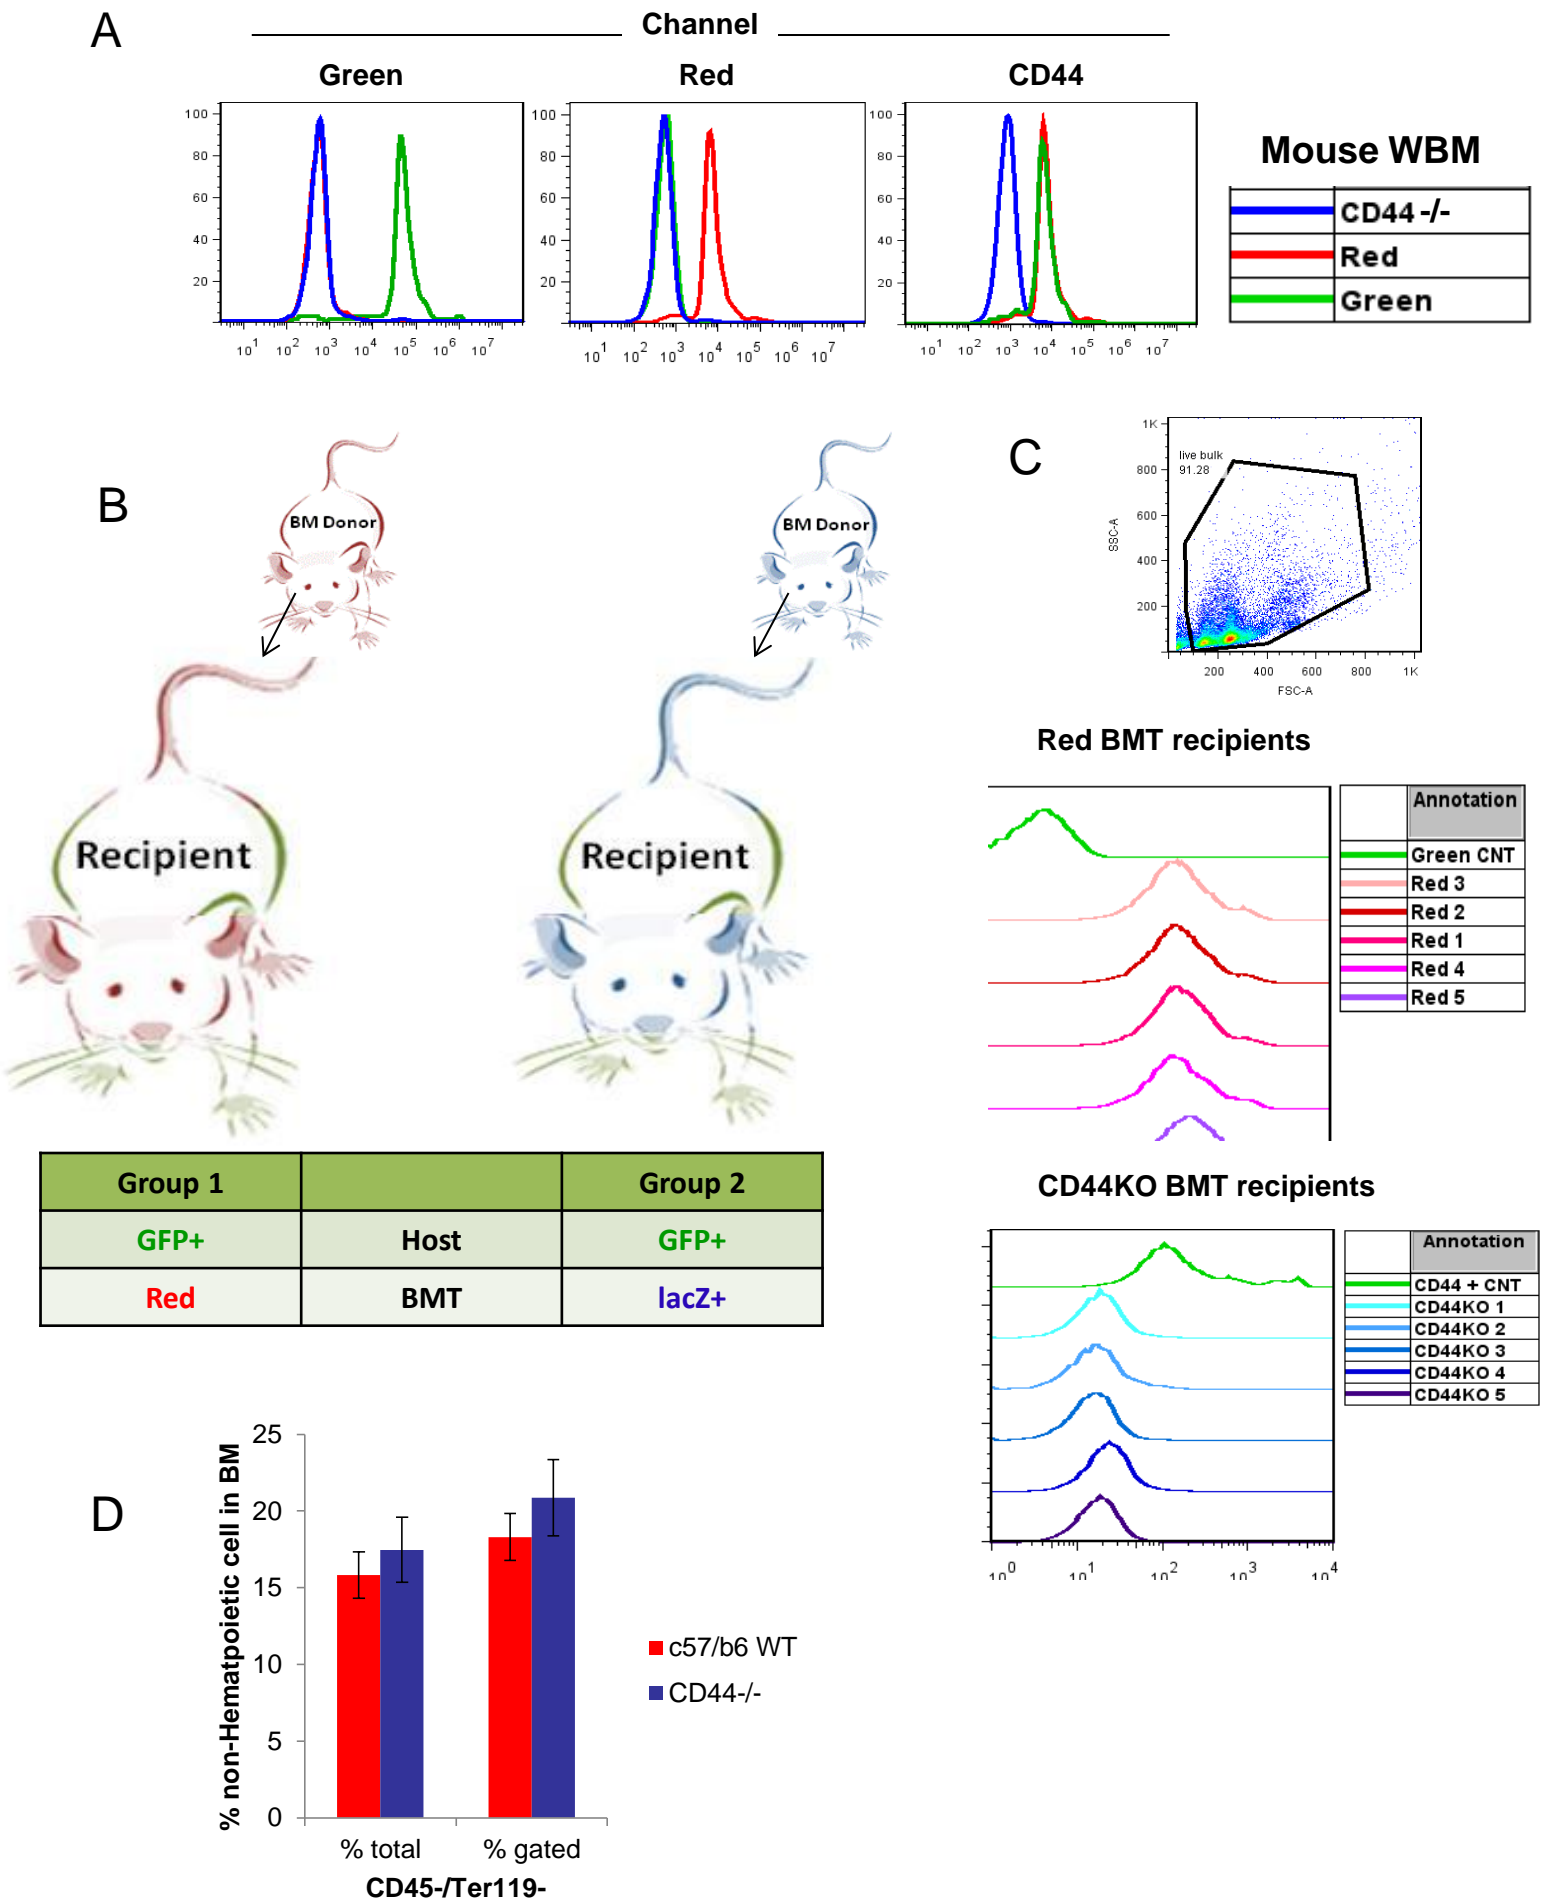

Figure S2

Bone marrow transplant #1

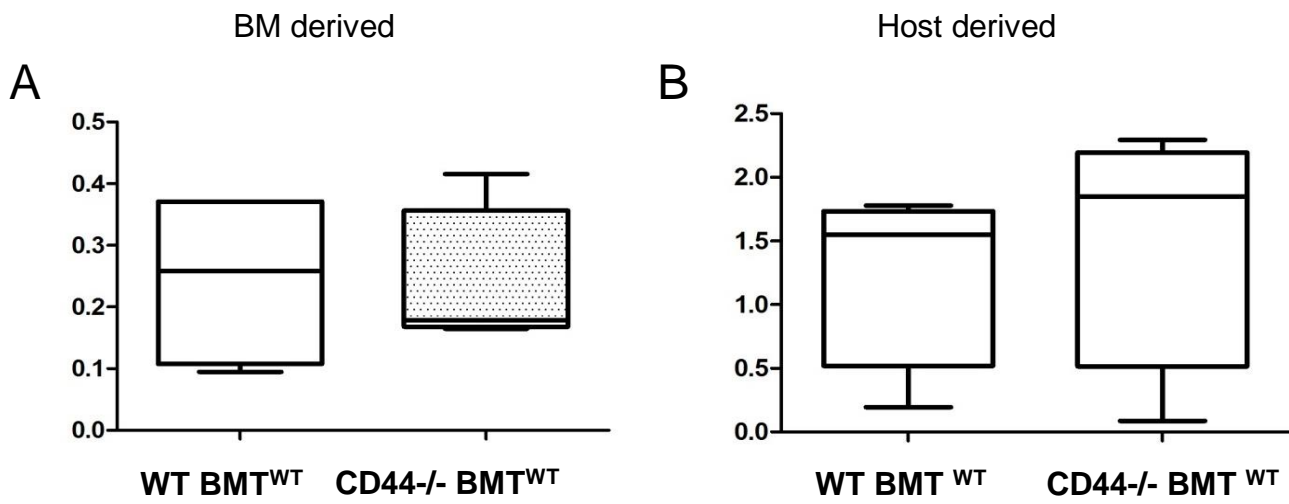

**C** Bone marrow transplant #1

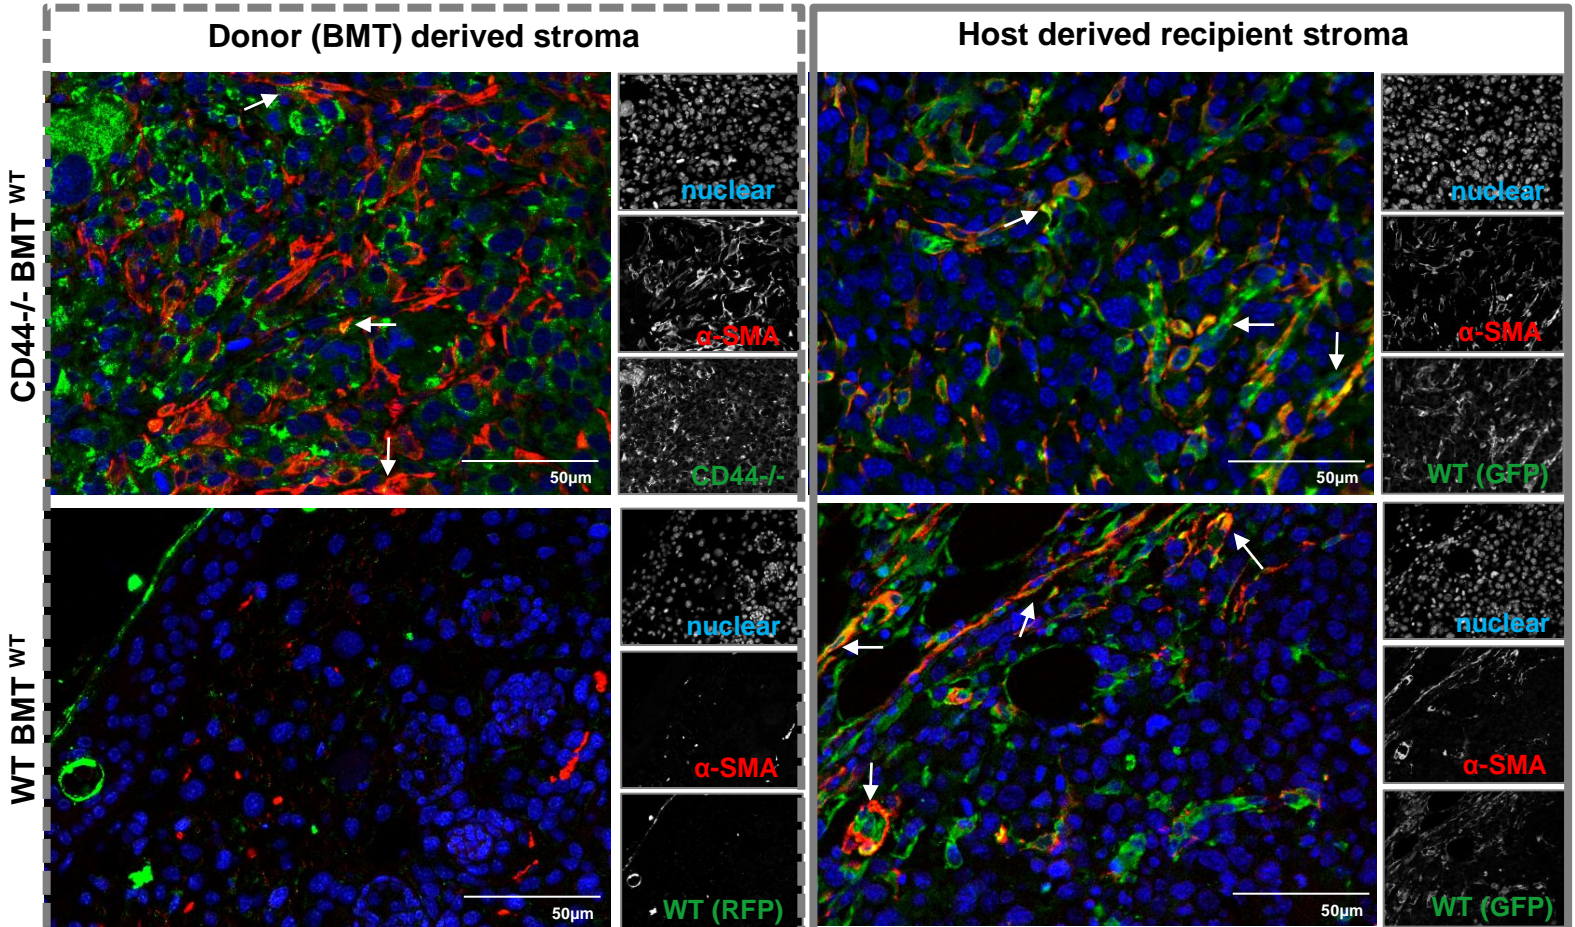

Figure S2 cont

Bone marrow transplant #2

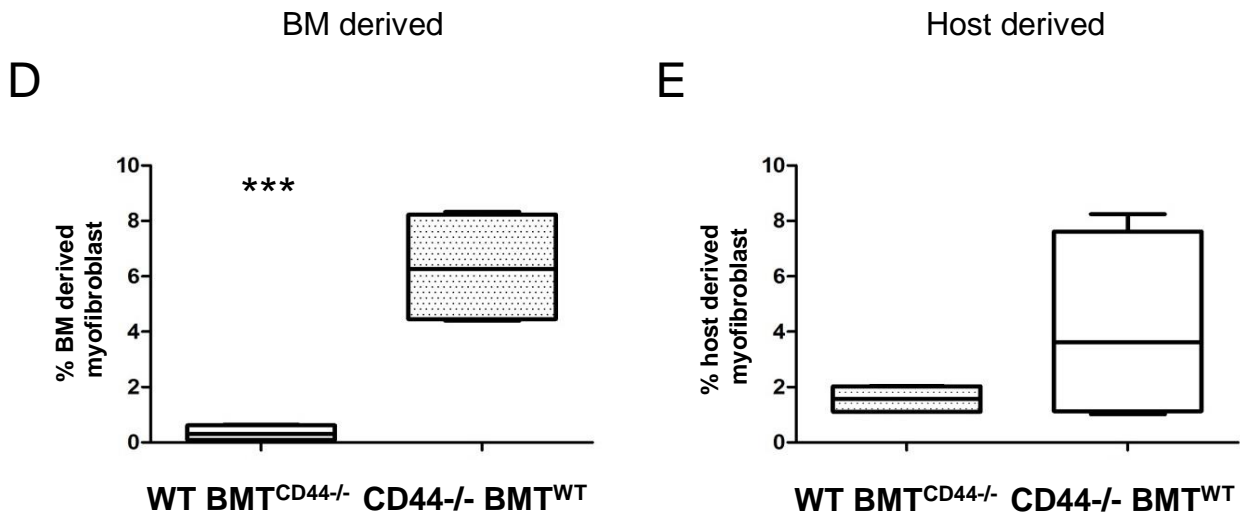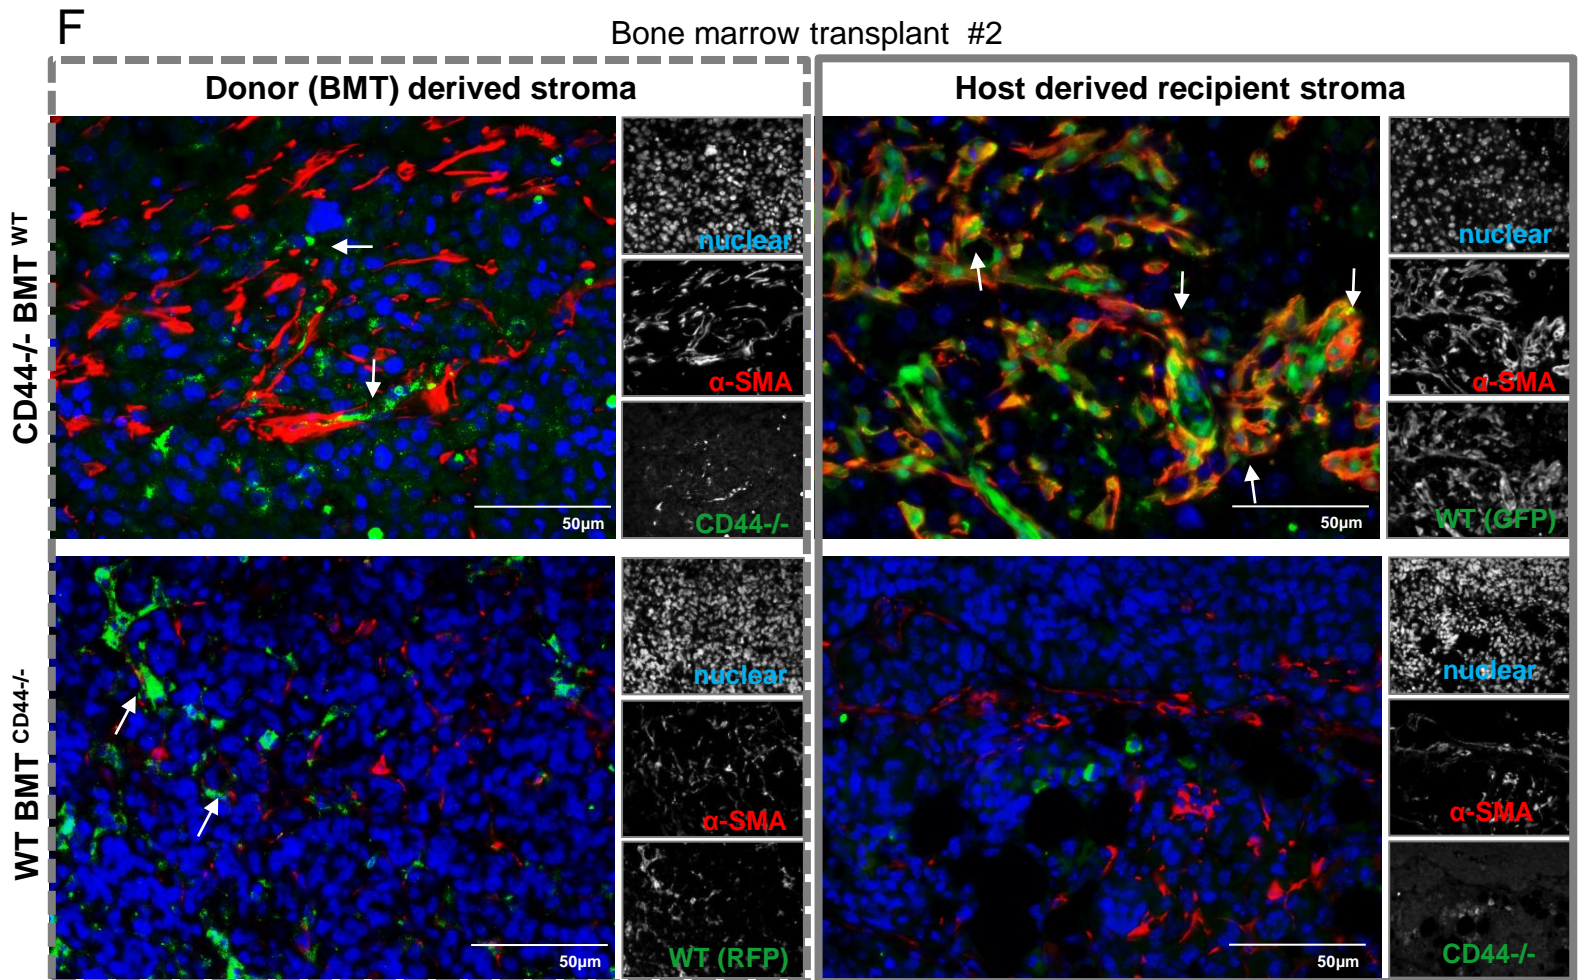

Figure S3

A

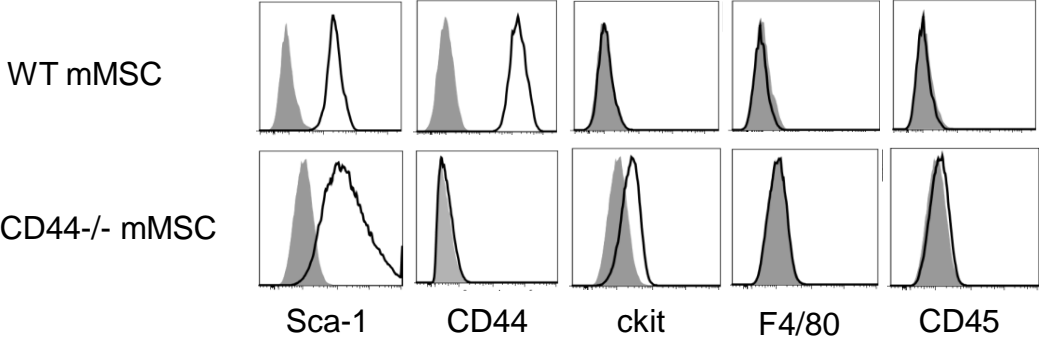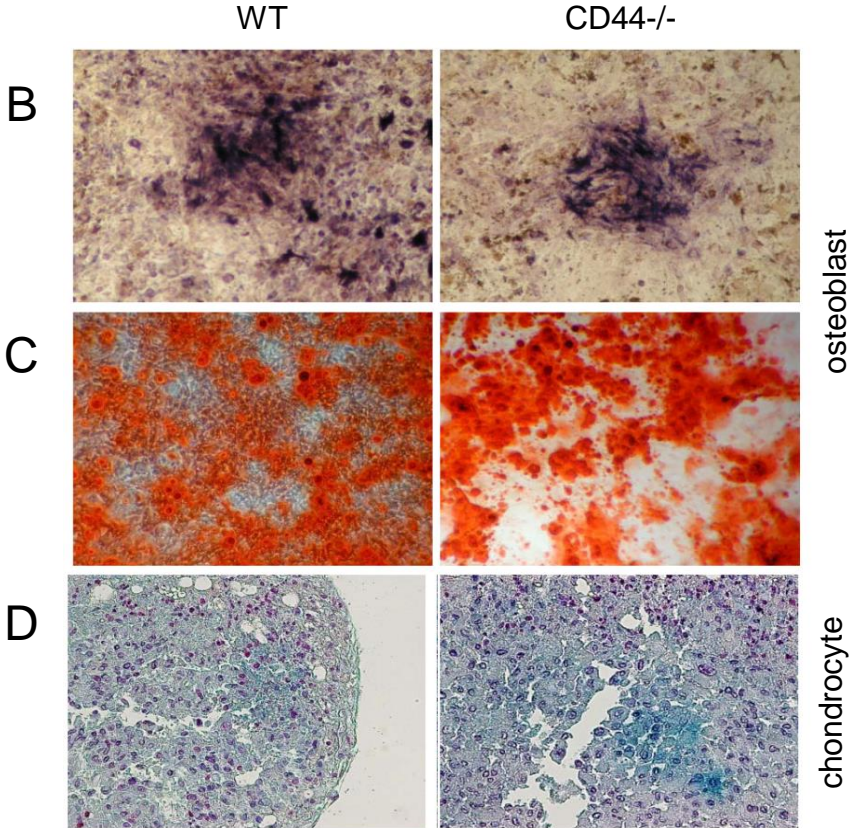

Figure S3

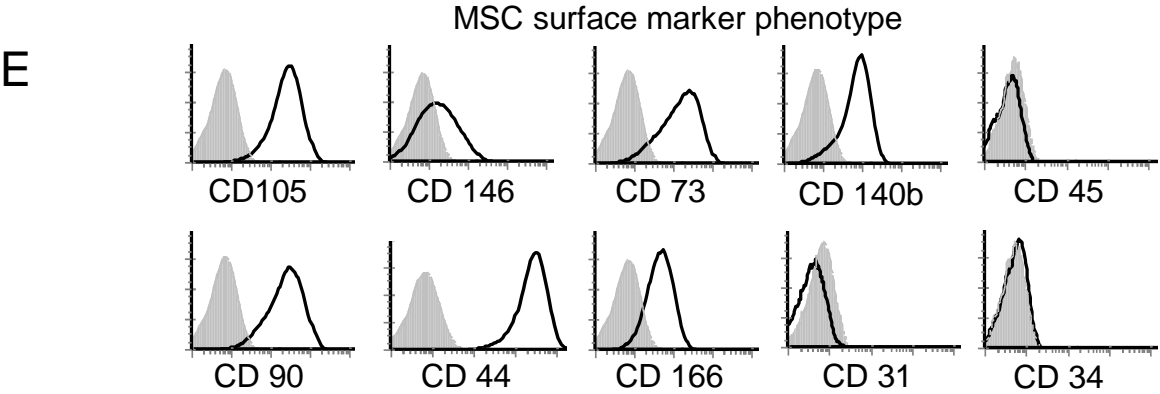

**Naïve hMSC**

**Ad+ hMSC**

**shNeg hMSC**

**shCD44 hMSC**

**F**

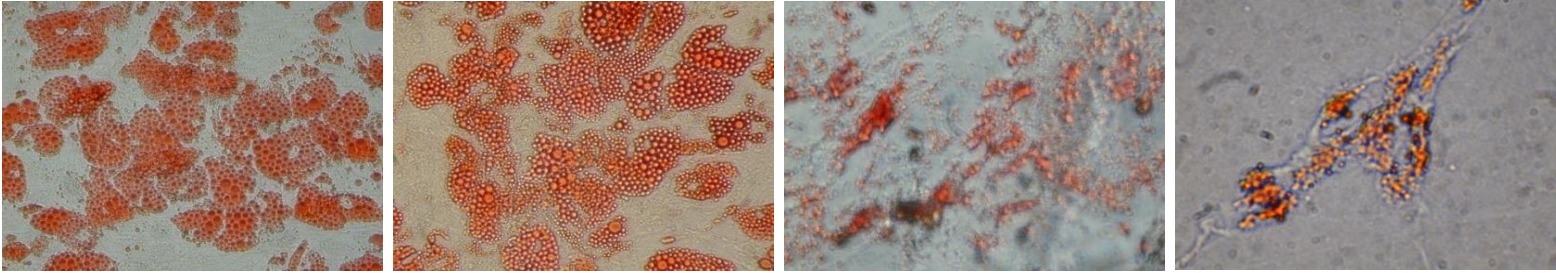

**G**

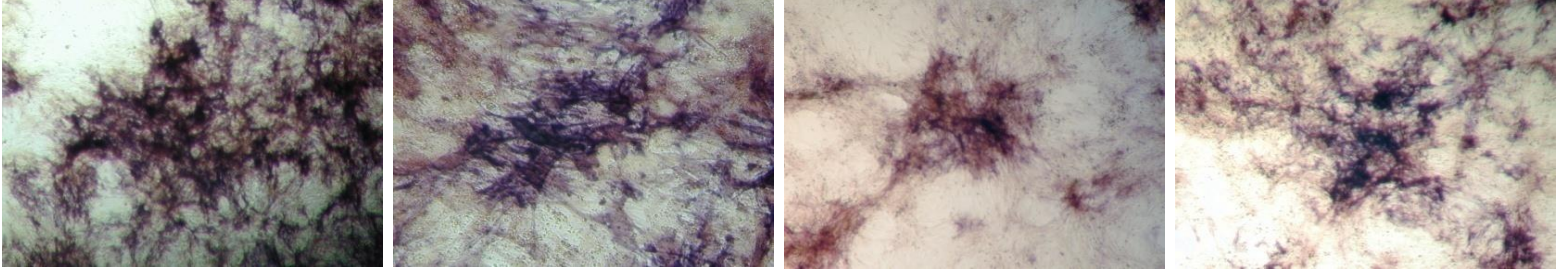

**H**

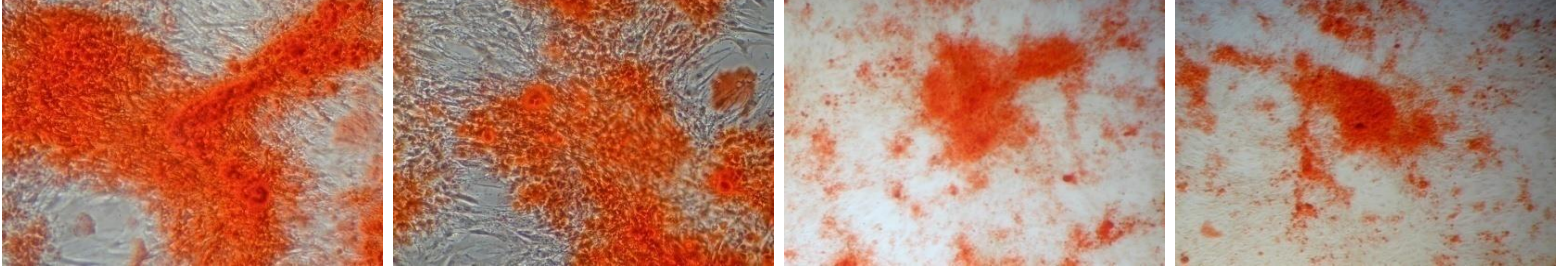

**I**

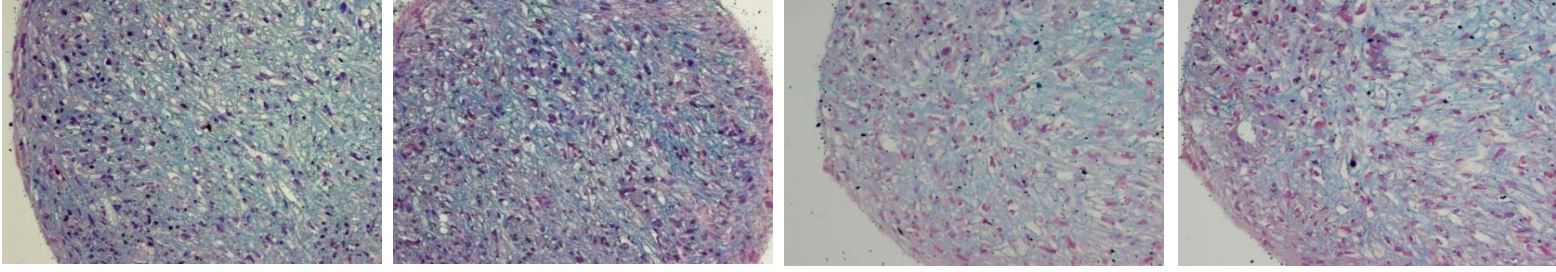

Figure S4

A

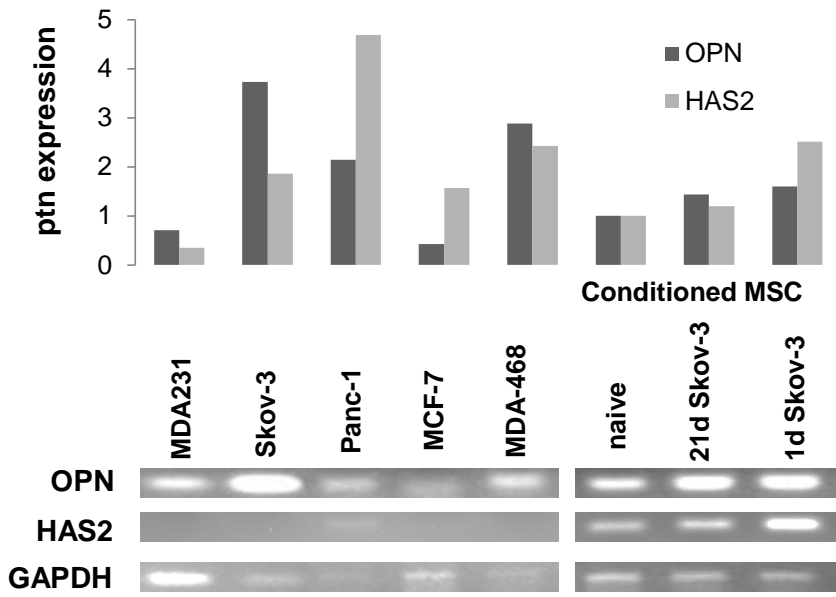

B

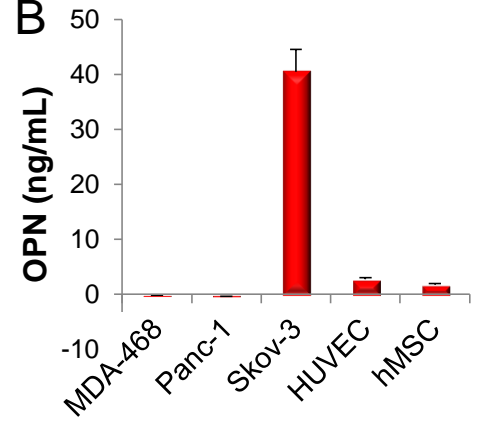

Figure S5

A

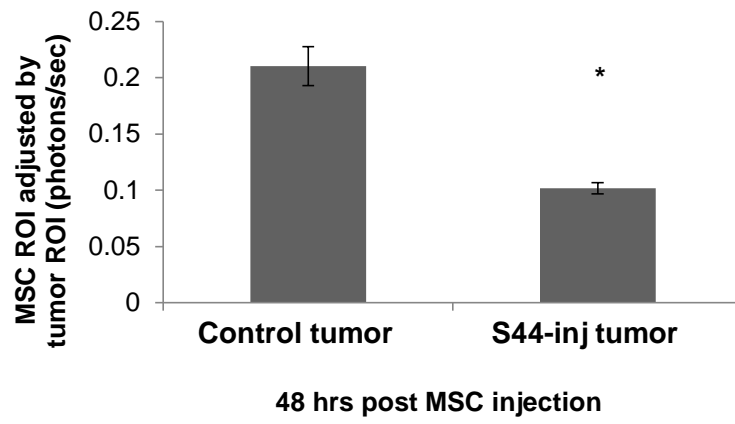

B

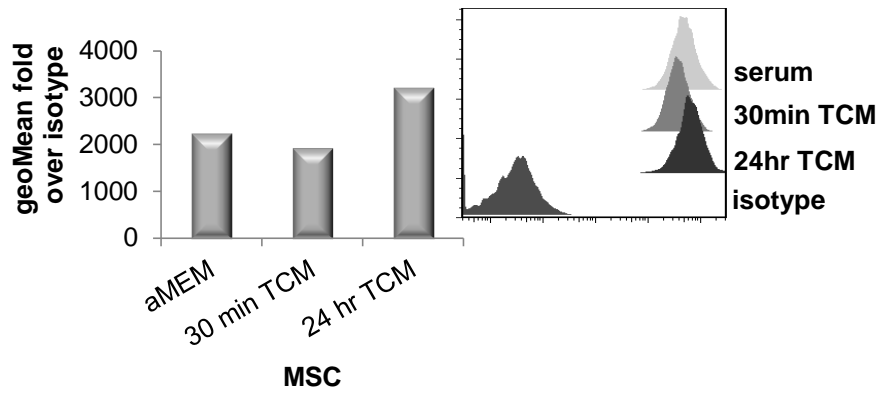

C

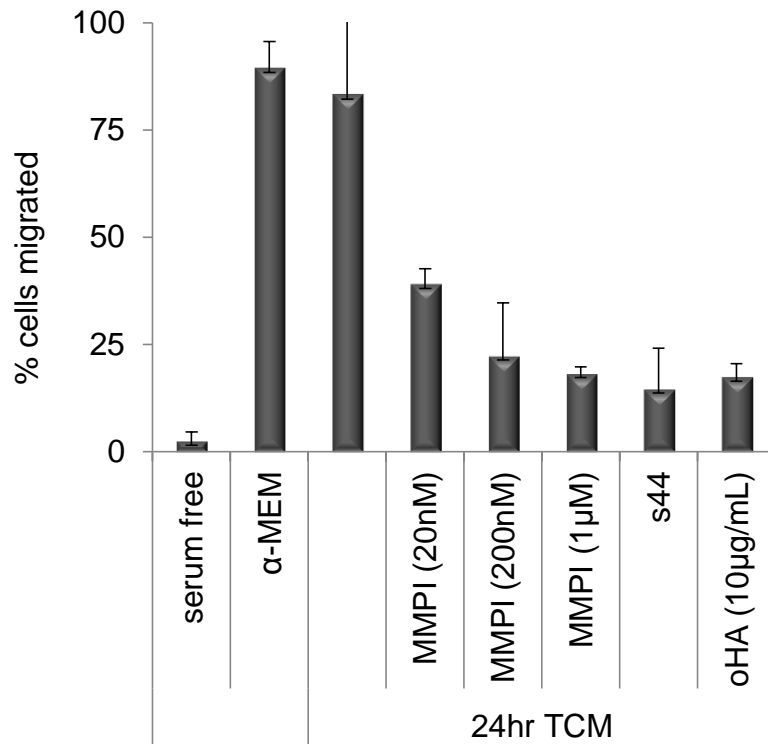

D

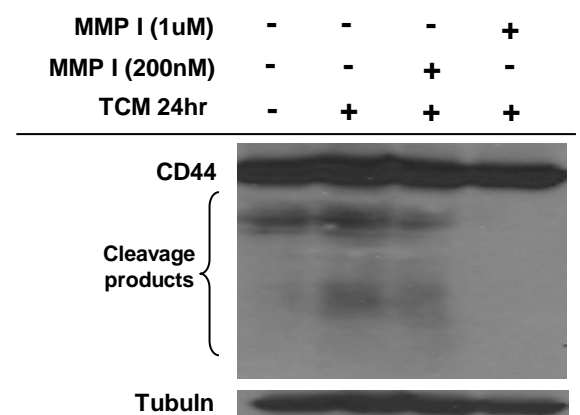

Supplement: NIHMS504095-supplement-2.pdf [file NIHMS504095-supplement-2.pdf]
