# Supplementary material
Source: PubMed Central journal article supplement (PMC3767181)
Supplement: NIHMS504095-supplement-1.pdf [file NIHMS504095-supplement-1.pdf]

Table S1

| Primer name    | sequence (5'-->3')                |
|----------------|-----------------------------------|
| EGF F          | CCT GCC TAG TCT GCG TCT TT        |
| EGF R          | CAC AAT ACC CAG AGC GAA CA        |
| HAS2 F         | GTGGATTATGTACAGGTTTGTGA           |
| HAS2 R         | TCCAACCATGGGATCTTCTT              |
| IL-8 F         | ATG ACT TCC AAG CTG GCC GTG GCT   |
| IL-8 R         | TCT CAG CCC TCT TCA AAA ACT TCT C |
| MMP2 F         | CTG ATG GCA CCC ATT TAC ACC       |
| MMP2 R         | GCC TCG TAT ACC GCA TCA ATC       |
| MMP9 F         | TTC TAC GGC CAC TAC TGT GCC T     |
| MMP9 R         | AAT CGC CAG TAC TTC CCA TCC T     |
| OPN F          | GCC AGT TGC AGC CTT CTC A         |
| OPN R          | GCA AAA GCA AAT CAC TGC AAT T     |
| PDGFRb F       | TAG CCT GCC TGA TCC CTG AA        |
| PDGFRb R       | GTC TGT GGT CTT AGC CAT GGA G     |
| TGF $\alpha$ F | GGA TTG ACA CAG AAG GAA CCA       |
| TGF $\alpha$ R | GCC TTG ACC CAT TCA GAA AA        |
| TGF $\beta$ F  | AAC CCA CAA CGA AAT CTA TGA C     |
| TGF $\beta$ R  | GCT GAG GTA TCG CCA GGA AT        |
| TSP1 F         | CCG GCG TGA AGT GTA CTA GCT A     |
| TSP1 R         | TGC ACT TGG CGT TCT TGT T         |
| Twist ChIP F   | CGG GGG AGG GGG ACT GGA AAG C     |
| Twist ChIP R   | AGG CCT CCT GGA AAC GGT GCC G     |
| Twist RT F     | GGA GTC CGC AGT CTT ACG AG        |
| Twist RT R     | TCT GGA GGA CCT GGT AGA GG        |
| VegfA F        | CTT GCC TTG CTG CTC TAC C         |
| VegfA R        | CAC ACA GGA TGG CTT GAA G         |
| VegfB F        | AGC ACC AAG TCC GGA TG            |
| VegfB R        | GTC TGG CTT CAC AGC ACT G         |
| VegfC F        | TGC CGA TGC ATG TCT AAA CT        |
| VegfC R        | TGA ACA GGT CTC TTC ATC CAG C     |
